# Supplementary material for: Copper Nanoparticle and Nitrogen Doped Graphite Oxide Based Biosensor for the Sensitive Determination of Glucose
Source: MDPI journal article supplement (doi:10.3390/nano8060429), 2018-06-13
Supplement: s1 [file s1]

## Supporting Information

### **Copper Nanoparticle and Nitrogen Doped Graphite Oxide Based Biosensor for the Sensitive Determination of Glucose**

Kulandaivel Sivasankar<sup>a</sup>, Karuppasamy Kohilarani<sup>b</sup>, Sea-Fue Wang<sup>\*b</sup>, Rajkumar Devasenathipathy<sup>b</sup>, Chia-Her Lin<sup>\*a,c</sup>

<sup>a</sup>Department of Chemistry, Chung-Yuan Christian University, Chungli, Taiwan 32023. E-mail: [chiaher@cycu.edu.tw](mailto:chiaher@cycu.edu.tw); Fax: +886-3-2653399; Tel: +886-3-2653315.

<sup>b</sup>Department of Materials and Mineral Resources Engineering, No. 1, Sec. 3, Chung-Hsiao East Rd., National Taipei University of Technology, Taipei, Taiwan E-mail: [sfwang@ntut.edu.tw](mailto:sfwang@ntut.edu.tw)

<sup>c</sup>R&D Center for Membrane Technology, Chung Yuan Christian University.

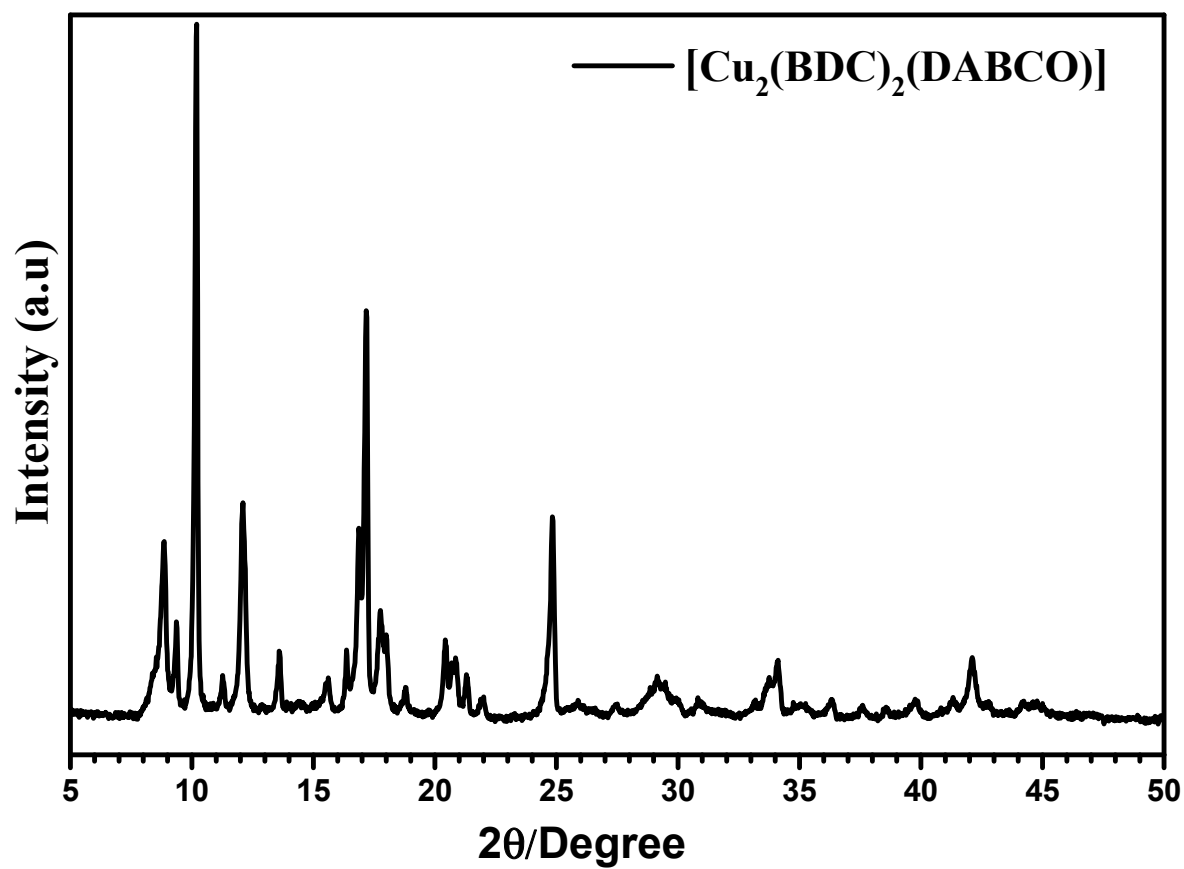

**Figure S1.** PXRD pattern of as-synthesized MOF  $[\text{Cu}_2(\text{BDC})_2(\text{DABCO})]$ .

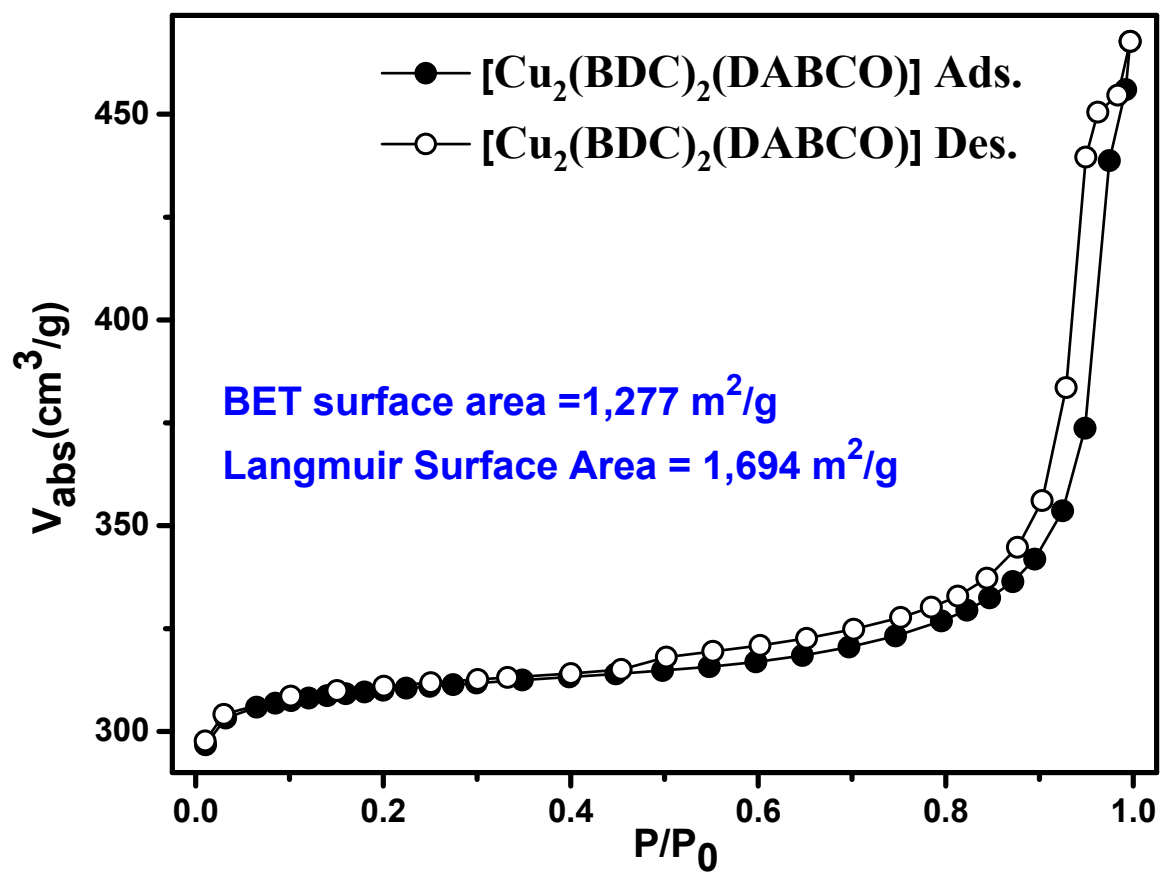

**Figure S2.**  $N_2$  adsorption analysis of activated MOF  $[Cu_2(BDC)_2(DABCO)]$ .

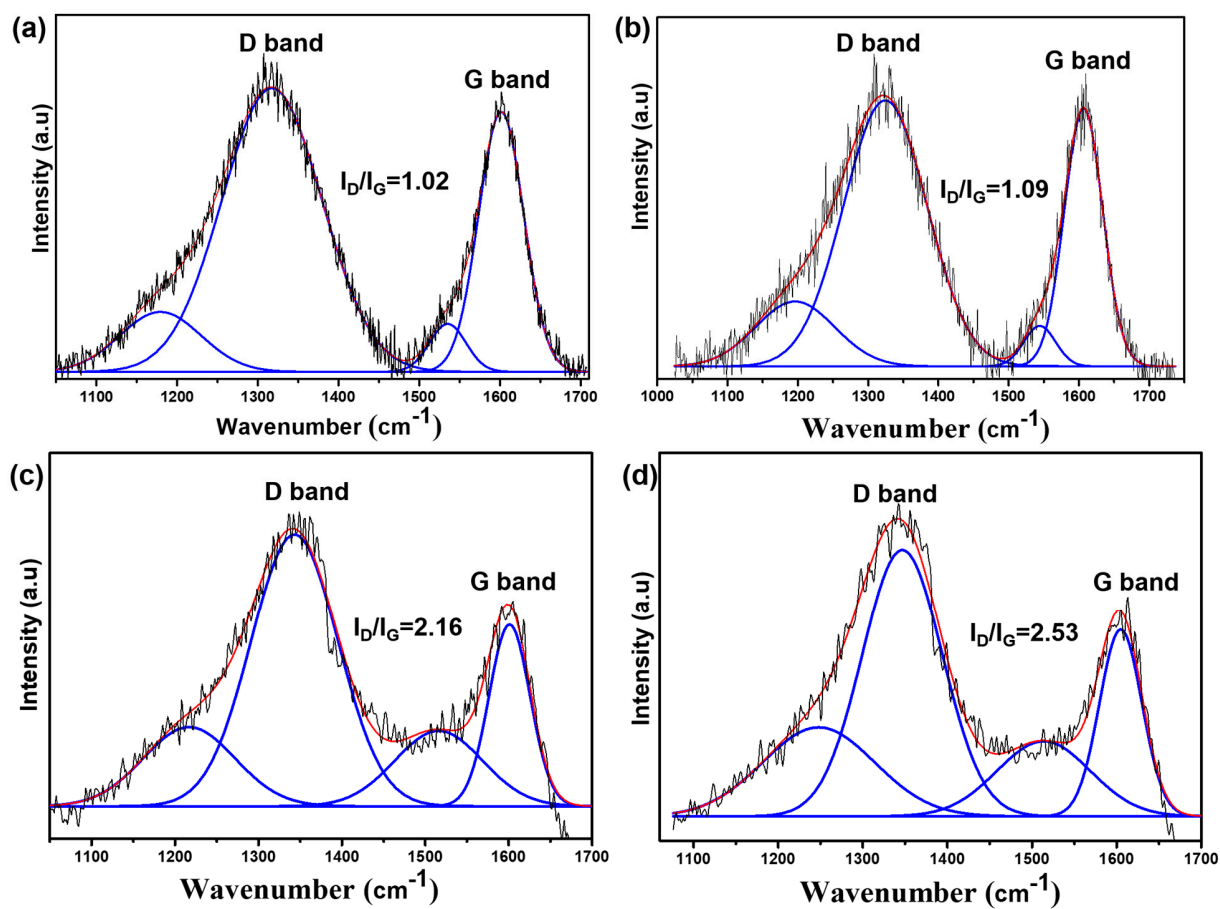

**Figure S3.** Raman spectra fitted with Gaussian profiles of CuNPs/NGO (carbonized at 600 °C (a), 700 °C (b), 800 °C (c) and 900 °C (d))

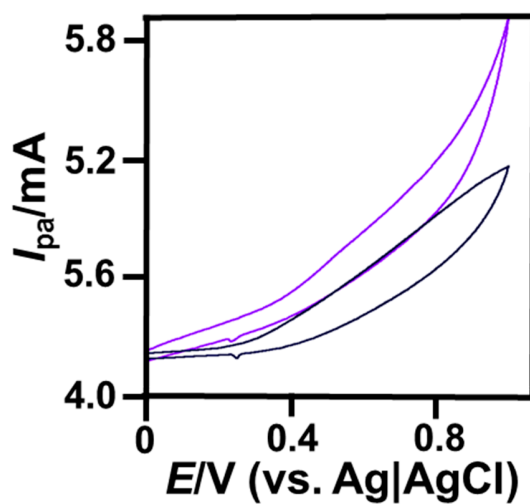

**Figure S4** CVs without (a) and with each addition (b-k) of 3 mM glucose at unmodified SPCE in 0.1 M NaOH at the scan rate of 50 mV/s

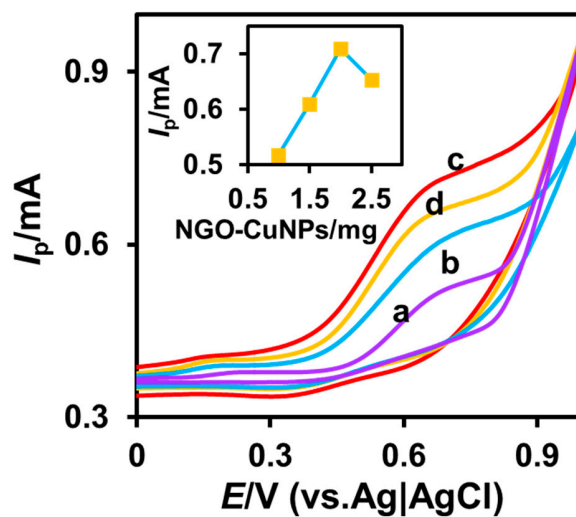

**Figure S5.** Voltammograms obtained at CuNPs/NGO modified SPCE for different loading concentrations (0.5, 1, 2 and 2.5 mg/ml (DMF)) of CuNPs/NGO

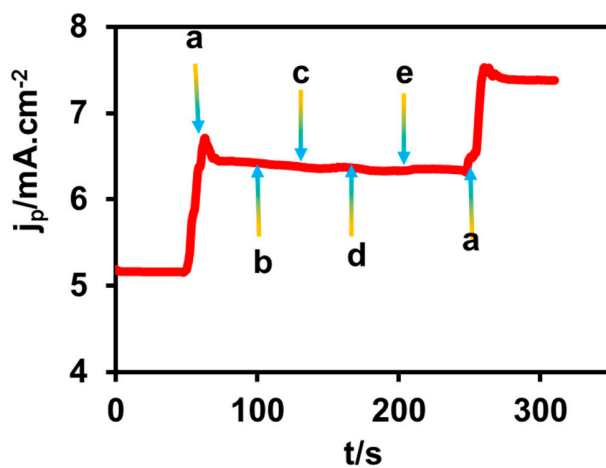

**Figure S6.** Selectivity study of CuNPs/NGO modified SPCE towards glucose (a) in presence of sucrose (b), dopamine (c), uric acid (d) and ascorbic acid (e).

**Table S1.** Repeatability study at CuNPs/NGO modified SPCE in 5 different solutions towards 3 mM Glucose and Reproducibility study at 5 different CuNPs/NGO modified SPCEs towards 3 mM Glucose

| Repeatability |              | Reproducibility |              |
|---------------|--------------|-----------------|--------------|
| Solution      | Current (mA) | Electrode       | Current (mA) |
| 1             | 0.701        | 1               | 0.714        |
| 2             | 0.688        | 2               | 0.721        |
| 3             | 0.721        | 3               | 0.713        |
| 4             | 0.713        | 4               | 0.696        |
| 5             | 0.683        | 5               | 0.692        |
| 6             | 0.724        | 6               | 0.726        |
| Average       | 0.705        | Average         | 0.710        |
| SD            | 0.01715      | SD              | 0.01355      |
| RSD           | 2.43         | RSD             | 1.91         |

**Table S2.** Stability study of 3 mM Glucose at CuNPs/NGO modified SPCE

| Time (Day) | Current (mA) | Current Retained (%) |
|------------|--------------|----------------------|
| 0          | 0.723        | 100                  |
| 5          | 0.718        | 99.3                 |
| 10         | 0.706        | 97.6                 |
| 20         | 0.701        | 96.9                 |
| 30         | 0.696        | 96.2                 |

**Table S3.** Determination of glucose in human blood serum samples.

| Serum Sample | Glucose detected by commercial detector(mM) | Glucose detected by our sensor | Recovery (%) | RSD  |
|--------------|---------------------------------------------|--------------------------------|--------------|------|
| 1            | 5.31                                        | 5.16                           | 97.15        | 2.3  |
| 2            | 5.05                                        | 5.09                           | 100.7        | 1.93 |
| 3            | 6.85                                        | 6.73                           | 98.24        | 2.42 |
| 4            | 6.61                                        | 6.49                           | 98.18        | 2.19 |

RSD – Relative standard deviation for three measurements.
